# Supplementary material for: Socioeconomic inequities in perceived health among patients with musculoskeletal disorders compared with other chronic disorders: results from a cross-sectional Dutch study
Source: HighWire-hosted journal article supplement (doi:10.1136/rmdopen-2014-000045), 2015-05-01
Supplement: rmdopen-2014-000045supp_appendix2.pdf [file rmdopen-2014-000045supp_appendix2.pdf]

Comparison of analyses performed on non-imputed data with the maximum and minimum extreme scenarios (missings on outcome are replaced by 90p and 10p value, respectively)

| <b>Model I (PCS as outcome)</b>                                  |                    |      |                     |      |                     |      |                                   |                                              |                                       |                                              |
|------------------------------------------------------------------|--------------------|------|---------------------|------|---------------------|------|-----------------------------------|----------------------------------------------|---------------------------------------|----------------------------------------------|
|                                                                  | <b>Actual data</b> |      | <b>Min scenario</b> |      | <b>Max scenario</b> |      | <b>Change (%)<br/>real to min</b> | <b>Change<br/>(absolute)<br/>real to min</b> | <b>Change (%)<br/>real to<br/>max</b> | <b>Change<br/>(absolute)<br/>real to max</b> |
|                                                                  | Beta               | P>t  | Beta                | P>t  | Beta                | P>t  |                                   |                                              |                                       |                                              |
| <b>Musculoskeletal diseases</b>                                  |                    |      |                     |      |                     |      |                                   |                                              |                                       |                                              |
| No education/lowest school vs. University education              | -5.71              | 0.00 | -4.76               | 0.00 | -2.34               | 0.06 | 17%                               | -0.96                                        | 144%                                  | -3.37                                        |
| Lower professional school vs. University education               | -2.96              | 0.00 | -2.93               | 0.00 | -1.58               | 0.08 | 1%                                | -0.03                                        | 87%                                   | -1.38                                        |
| Middle or professional secondary school vs. University education | -2.44              | 0.00 | -2.43               | 0.00 | -2.11               | 0.00 | 0%                                | -0.01                                        | 16%                                   | -0.33                                        |
| Secondary school vs. University education                        | -1.89              | 0.05 | -1.60               | 0.07 | -2.32               | 0.03 | 15%                               | -0.28                                        | -19%                                  | 0.43                                         |
| Age (years)                                                      | -0.14              | 0.00 | -0.15               | 0.00 | -0.03               | 0.12 | -2%                               | 0.00                                         | 341%                                  | -0.11                                        |
| Female vs. male                                                  | -2.71              | 0.00 | -2.43               | 0.00 | -2.02               | 0.00 | 10%                               | -0.28                                        | 34%                                   | -0.69                                        |
| Number of comorbidities                                          | -2.77              | 0.00 | -2.30               | 0.00 | -2.19               | 0.00 | 17%                               | -0.47                                        | 26%                                   | -0.58                                        |
| Overweight vs Normal                                             | 0.34               | 0.59 | 0.39                | 0.49 | 0.18                | 0.78 | -14%                              | -0.05                                        | 88%                                   | 0.16                                         |
| Obese vs Normal                                                  | -1.80              | 0.03 | -1.67               | 0.02 | -2.92               | 0.00 | 8%                                | -0.14                                        | -38%                                  | 1.11                                         |
| Smoking (current vs. never)                                      | -2.80              | 0.00 | -2.85               | 0.00 | -2.29               | 0.01 | -2%                               | 0.05                                         | 23%                                   | -0.52                                        |
| Smoking (smoked before vs. never)                                | -0.89              | 0.16 | -1.08               | 0.06 | -1.26               | 0.06 | -21%                              | 0.19                                         | -29%                                  | 0.37                                         |
| <b>Cardio-vascular diseases</b>                                  |                    |      |                     |      |                     |      |                                   |                                              |                                       |                                              |
| No education/lowest school vs. University education              | -6.66              | 0.00 | -6.02               | 0.00 | -3.13               | 0.00 | 10%                               | -0.64                                        | 113%                                  | -3.53                                        |
| Lower professional school vs. University education               | -3.06              | 0.00 | -3.53               | 0.00 | -0.93               | 0.24 | -15%                              | 0.47                                         | 230%                                  | -2.14                                        |
| Middle or professional secondary school vs. University education | -1.89              | 0.00 | -1.92               | 0.00 | -1.52               | 0.02 | -1%                               | 0.02                                         | 25%                                   | -0.37                                        |

|                                                                  |       |      |       |      |       |      |       |       |       |       |
|------------------------------------------------------------------|-------|------|-------|------|-------|------|-------|-------|-------|-------|
| Secondary school vs. University education                        | -1.85 | 0.04 | -1.44 | 0.09 | -2.29 | 0.01 | 22%   | -0.41 | -19%  | 0.44  |
| Age (years)                                                      | -0.19 | 0.00 | -0.22 | 0.00 | -0.09 | 0.00 | -15%  | 0.03  | 119%  | -0.11 |
| Female vs. male                                                  | -1.74 | 0.00 | -1.60 | 0.00 | -1.28 | 0.02 | 8%    | -0.14 | 36%   | -0.46 |
| Number of comorbidities                                          | -4.99 | 0.00 | -4.16 | 0.00 | -4.09 | 0.00 | 17%   | -0.83 | 22%   | -0.90 |
| Overweight vs Normal                                             | 0.60  | 0.31 | 0.44  | 0.41 | 0.60  | 0.31 | 27%   | 0.16  | 0%    | 0.00  |
| Obese vs Normal                                                  | -1.73 | 0.02 | -1.72 | 0.01 | -2.10 | 0.01 | 1%    | -0.01 | -18%  | 0.37  |
| Smoking (current vs. never)                                      | -1.26 | 0.12 | -1.24 | 0.10 | -1.64 | 0.05 | 1%    | -0.02 | -23%  | 0.38  |
| Smoking (smoked before vs. never)                                | 0.39  | 0.50 | 0.30  | 0.57 | -0.34 | 0.56 | 24%   | 0.09  | -215% | 0.73  |
| <b>Diabetes</b>                                                  |       |      |       |      |       |      |       |       |       |       |
| No education/lowest school vs. University education              | -4.62 | 0.01 | -5.13 | 0.00 | 0.56  | 0.76 | -11%  | 0.50  | -926% | -5.18 |
| Lower professional school vs. University education               | -0.99 | 0.48 | -2.66 | 0.03 | 1.59  | 0.28 | -170% | 1.68  | -162% | -2.58 |
| Middle or professional secondary school vs. University education | 0.33  | 0.78 | -0.50 | 0.66 | 1.74  | 0.20 | 250%  | 0.83  | -81%  | -1.40 |
| Secondary school vs. University education                        | -0.10 | 0.95 | -0.85 | 0.57 | 0.20  | 0.91 | -769% | 0.75  | -148% | -0.30 |
| Age (years)                                                      | -0.20 | 0.00 | -0.20 | 0.00 | -0.10 | 0.01 | -1%   | 0.00  | 91%   | -0.09 |
| Female vs. male                                                  | -3.45 | 0.00 | -2.52 | 0.01 | -2.82 | 0.01 | 27%   | -0.92 | 22%   | -0.63 |
| Number of comorbidities                                          | -4.01 | 0.00 | -3.24 | 0.00 | -2.82 | 0.00 | 19%   | -0.77 | 42%   | -1.20 |
| Overweight vs Normal                                             | -1.26 | 0.29 | -0.02 | 0.98 | -1.64 | 0.19 | 98%   | -1.24 | -23%  | 0.38  |
| Obese vs Normal                                                  | -3.49 | 0.01 | -2.38 | 0.04 | -4.21 | 0.00 | 32%   | -1.11 | -17%  | 0.71  |
| Smoking (current vs. never)                                      | -1.99 | 0.17 | -2.16 | 0.09 | -2.30 | 0.13 | -9%   | 0.17  | -13%  | 0.31  |
| Smoking (smoked before vs. never)                                | -1.60 | 0.14 | -1.07 | 0.26 | -2.36 | 0.04 | 33%   | -0.52 | -32%  | 0.76  |
| <b>Mental</b>                                                    |       |      |       |      |       |      |       |       |       |       |
| No education/lowest school vs. University education              | -6.62 | 0.00 | -5.93 | 0.01 | -3.51 | 0.12 | 10%   | -0.69 | 89%   | -3.11 |
| Lower professional school vs. University education               | -8.66 | 0.00 | -8.46 | 0.00 | -6.89 | 0.00 | 2%    | -0.21 | 26%   | -1.77 |
| Middle or professional secondary school vs. University education | -2.31 | 0.03 | -2.30 | 0.03 | -1.83 | 0.10 | 0%    | 0.00  | 26%   | -0.47 |

|                                                                  |        |      |       |      |       |      |       |       |       |       |
|------------------------------------------------------------------|--------|------|-------|------|-------|------|-------|-------|-------|-------|
| Secondary school vs. University education                        | -3.91  | 0.00 | -3.62 | 0.01 | -3.75 | 0.01 | 7%    | -0.29 | 4%    | -0.16 |
| Age (years)                                                      | -0.11  | 0.00 | -0.12 | 0.00 | -0.07 | 0.06 | -6%   | 0.01  | 68%   | -0.04 |
| Female vs. male                                                  | -1.53  | 0.11 | -1.50 | 0.11 | -1.27 | 0.21 | 2%    | -0.04 | 21%   | -0.26 |
| Number of comorbidities                                          | -4.04  | 0.00 | -3.65 | 0.00 | -3.64 | 0.00 | 10%   | -0.40 | 11%   | -0.40 |
| Overweight vs Normal                                             | -2.87  | 0.01 | -2.88 | 0.01 | -2.74 | 0.01 | 0%    | 0.01  | 5%    | -0.13 |
| Obese vs Normal                                                  | -1.05  | 0.40 | -1.37 | 0.25 | -1.46 | 0.26 | -31%  | 0.32  | -28%  | 0.41  |
| Smoking (current vs. never)                                      | -2.92  | 0.01 | -2.45 | 0.02 | -2.29 | 0.04 | 16%   | -0.47 | 27%   | -0.63 |
| Smoking (smoked before vs. never)                                | 1.79   | 0.09 | 1.80  | 0.08 | 1.75  | 0.11 | -1%   | -0.01 | 3%    | 0.04  |
| <b>Cancer</b>                                                    |        |      |       |      |       |      |       |       |       |       |
| No education/lowest school vs. University education              | -3.60  | 0.28 | -3.73 | 0.16 | -0.21 | 0.95 | -4%   | 0.13  | 1657% | -3.40 |
| Lower professional school vs. University education               | 0.53   | 0.84 | -0.91 | 0.67 | 3.82  | 0.13 | 273%  | 1.43  | -86%  | -3.29 |
| Middle or professional secondary school vs. University education | -0.10  | 0.96 | -0.72 | 0.68 | 1.77  | 0.38 | -629% | 0.62  | -106% | -1.86 |
| Secondary school vs. University education                        | 2.99   | 0.21 | 2.83  | 0.19 | 2.39  | 0.35 | 5%    | 0.16  | 25%   | 0.59  |
| Age (years)                                                      | -0.07  | 0.35 | -0.10 | 0.07 | 0.03  | 0.70 | -57%  | 0.04  | -352% | -0.09 |
| Female vs. male                                                  | -2.93  | 0.07 | -2.50 | 0.07 | -2.20 | 0.17 | 15%   | -0.43 | 33%   | -0.73 |
| Number of comorbidities                                          | -3.27  | 0.00 | -2.42 | 0.00 | -2.05 | 0.00 | 26%   | -0.84 | 59%   | -1.22 |
| Overweight vs Normal                                             | -2.36  | 0.17 | -2.10 | 0.15 | -1.33 | 0.44 | 11%   | -0.26 | 77%   | -1.03 |
| Obese vs Normal                                                  | -0.67  | 0.77 | -0.96 | 0.63 | -1.00 | 0.66 | -44%  | 0.29  | -33%  | 0.33  |
| Smoking (current vs. never)                                      | -3.47  | 0.14 | -2.94 | 0.15 | -2.90 | 0.22 | 15%   | -0.53 | 20%   | -0.57 |
| Smoking (smoked before vs. never)                                | 0.43   | 0.80 | 0.70  | 0.63 | -0.28 | 0.87 | -64%  | -0.27 | -255% | 0.71  |
| <b>Respiratory diseases</b>                                      |        |      |       |      |       |      |       |       |       |       |
| No education/lowest school vs. University education              | -10.89 | 0.00 | -9.03 | 0.00 | -4.05 | 0.03 | 17%   | -1.86 | 169%  | -6.84 |
| Lower professional school vs. University education               | -4.52  | 0.00 | -4.49 | 0.00 | -2.97 | 0.03 | 1%    | -0.03 | 52%   | -1.55 |
| Middle or professional secondary school vs. University education | -2.08  | 0.06 | -2.47 | 0.02 | -1.42 | 0.23 | -19%  | 0.40  | 47%   | -0.66 |

|                                                                  |       |      |       |      |       |      |      |       |        |       |
|------------------------------------------------------------------|-------|------|-------|------|-------|------|------|-------|--------|-------|
| Secondary school vs. University education                        | 0.60  | 0.69 | 0.16  | 0.91 | 0.59  | 0.72 | 74%  | 0.44  | 1%     | 0.01  |
| Age (years)                                                      | -0.14 | 0.00 | -0.14 | 0.00 | -0.05 | 0.15 | -5%  | 0.01  | 195%   | -0.09 |
| Female vs. male                                                  | -0.47 | 0.62 | -0.35 | 0.69 | 0.36  | 0.72 | 26%  | -0.12 | -229%  | -0.83 |
| Number of comorbidities                                          | -3.94 | 0.00 | -3.27 | 0.00 | -3.31 | 0.00 | 17%  | -0.67 | 19%    | -0.63 |
| Overweight vs Normal                                             | -2.33 | 0.02 | -1.63 | 0.07 | -2.02 | 0.06 | 30%  | -0.69 | 15%    | -0.31 |
| Obese vs Normal                                                  | -2.52 | 0.04 | -2.20 | 0.05 | -3.06 | 0.02 | 13%  | -0.32 | -18%   | 0.54  |
| Smoking (current vs. never)                                      | -2.40 | 0.06 | -3.09 | 0.01 | -3.34 | 0.01 | -29% | 0.69  | -28%   | 0.93  |
| Smoking (smoked before vs. never)                                | 0.71  | 0.48 | -0.03 | 0.98 | -0.06 | 0.96 | 104% | 0.74  | -1329% | 0.77  |
| <b>Healthy population (no disease reported)</b>                  |       |      |       |      |       |      |      |       |        |       |
| No education/lowest school vs. University education              | -3.97 | 0.00 | -5.72 | 0.00 | -2.51 | 0.00 | -44% | 1.74  | 58%    | -1.46 |
| Lower professional school vs. University education               | -1.13 | 0.00 | -2.07 | 0.00 | -0.75 | 0.01 | -84% | 0.95  | 51%    | -0.38 |
| Middle or professional secondary school vs. University education | -0.72 | 0.00 | -0.93 | 0.00 | -0.65 | 0.00 | -29% | 0.21  | 11%    | -0.07 |
| Secondary school vs. University education                        | -0.19 | 0.48 | -0.27 | 0.40 | -0.15 | 0.56 | -41% | 0.08  | 24%    | -0.04 |
| Age (years)                                                      | -0.05 | 0.00 | -0.09 | 0.00 | -0.03 | 0.00 | -83% | 0.04  | 46%    | -0.02 |
| Female vs. male                                                  | -0.82 | 0.00 | -0.87 | 0.00 | -0.73 | 0.00 | -6%  | 0.05  | 13%    | -0.09 |
| Overweight vs Normal                                             | -0.62 | 0.00 | -0.36 | 0.09 | -0.63 | 0.00 | 41%  | -0.25 | -3%    | 0.02  |
| Obese vs Normal                                                  | -2.11 | 0.00 | -2.51 | 0.00 | -1.78 | 0.00 | -19% | 0.40  | 18%    | -0.33 |
| Smoking (current vs. never)                                      | -0.27 | 0.24 | -0.26 | 0.34 | -0.30 | 0.18 | 4%   | -0.01 | -11%   | 0.03  |
| Smoking (smoked before vs. never)                                | -0.19 | 0.31 | 0.06  | 0.78 | -0.27 | 0.14 | 132% | -0.26 | -29%   | 0.08  |

| <b>Model I (MCS as outcome)</b>                                  |                    |      |                     |      |                     |      |                                   |                                              |                                       |                                              |
|------------------------------------------------------------------|--------------------|------|---------------------|------|---------------------|------|-----------------------------------|----------------------------------------------|---------------------------------------|----------------------------------------------|
|                                                                  | <b>Actual data</b> |      | <b>Min scenario</b> |      | <b>Max scenario</b> |      | <b>Change (%)<br/>real to min</b> | <b>Change<br/>(absolute)<br/>real to min</b> | <b>Change (%)<br/>real to<br/>max</b> | <b>Change<br/>(absolute)<br/>real to max</b> |
|                                                                  | Beta               | P>t  | Beta                | P>t  | Beta                | P>t  |                                   |                                              |                                       |                                              |
| <b>Musculoskeletal diseases</b>                                  |                    |      |                     |      |                     |      |                                   |                                              |                                       |                                              |
| No education/lowest school vs. University education              | -3.14              | 0.01 | -5.06               | 0.00 | -1.54               | 0.11 | -61%                              | 1.92                                         | 104%                                  | -1.60                                        |
| Lower professional school vs. University education               | -1.92              | 0.01 | -2.95               | 0.00 | -1.15               | 0.10 | -54%                              | 1.03                                         | 68%                                   | -0.77                                        |
| Middle or professional secondary school vs. University education | -0.51              | 0.40 | -2.63               | 0.00 | -0.41               | 0.48 | -415%                             | 2.12                                         | 25%                                   | -0.10                                        |
| Secondary school vs. University education                        | -1.47              | 0.09 | -1.95               | 0.03 | -1.65               | 0.04 | -32%                              | 0.47                                         | -11%                                  | 0.18                                         |
| Age (years)                                                      | 0.12               | 0.00 | -0.12               | 0.00 | 0.15                | 0.00 | 202%                              | 0.24                                         | -21%                                  | -0.03                                        |
| N of comorbidities                                               | -2.35              | 0.00 | -2.45               | 0.00 | -1.96               | 0.00 | -4%                               | 0.10                                         | 20%                                   | -0.40                                        |
| Smoking (current vs. never)                                      | -2.04              | 0.00 | -2.38               | 0.00 | -1.64               | 0.01 | -17%                              | 0.34                                         | 24%                                   | -0.40                                        |
| Smoking (smoked before vs. never)                                | 0.46               | 0.40 | -0.53               | 0.35 | 0.31                | 0.54 | 215%                              | 0.98                                         | 48%                                   | 0.15                                         |
| <b>Cardio-vascular diseases</b>                                  |                    |      |                     |      |                     |      |                                   |                                              |                                       |                                              |
| No education/lowest school vs. University education              | -3.62              | 0.00 | -6.37               | 0.00 | -1.71               | 0.04 | -76%                              | 2.75                                         | 112%                                  | -1.92                                        |
| Lower professional school vs. University education               | -2.15              | 0.00 | -3.58               | 0.00 | -0.75               | 0.24 | -67%                              | 1.43                                         | 185%                                  | -1.39                                        |
| Middle or professional secondary school vs. University education | -0.70              | 0.23 | -2.21               | 0.00 | -0.50               | 0.36 | -214%                             | 1.51                                         | 42%                                   | -0.21                                        |
| Secondary school vs. University education                        | -0.14              | 0.86 | -1.93               | 0.02 | -0.39               | 0.60 | -1286%                            | 1.80                                         | -65%                                  | 0.25                                         |
| Age (years)                                                      | 0.08               | 0.00 | -0.19               | 0.00 | 0.11                | 0.00 | 337%                              | 0.26                                         | -32%                                  | -0.04                                        |
| N of comorbidities                                               | -2.13              | 0.00 | -4.41               | 0.00 | -1.73               | 0.00 | -107%                             | 2.28                                         | 24%                                   | -0.41                                        |
| Smoking (current vs. never)                                      | -1.40              | 0.05 | -0.80               | 0.27 | -1.43               | 0.03 | 43%                               | -0.60                                        | -2%                                   | 0.03                                         |
| Smoking (smoked before vs. never)                                | 0.46               | 0.36 | 0.66                | 0.18 | 0.12                | 0.80 | -45%                              | -0.20                                        | 287%                                  | 0.34                                         |

| <b>Diabetes</b>                                                  |       |      |       |      |       |      |        |       |        |       |
|------------------------------------------------------------------|-------|------|-------|------|-------|------|--------|-------|--------|-------|
| No education/lowest school vs. University education              | -1.98 | 0.25 | -5.88 | 0.00 | 0.43  | 0.77 | -197%  | 3.90  | -562%  | -2.41 |
| Lower professional school vs. University education               | -1.79 | 0.17 | -2.66 | 0.03 | 0.15  | 0.90 | -48%   | 0.87  | -1315% | -1.94 |
| Middle or professional secondary school vs. University education | -0.49 | 0.67 | -0.90 | 0.42 | 0.21  | 0.85 | -85%   | 0.41  | -334%  | -0.69 |
| Secondary school vs. University education                        | 1.34  | 0.37 | -1.79 | 0.23 | 1.39  | 0.32 | 233%   | 3.13  | -4%    | -0.05 |
| Age (years)                                                      | 0.07  | 0.05 | -0.16 | 0.00 | 0.10  | 0.00 | 326%   | 0.23  | -28%   | -0.03 |
| N of comorbidities                                               | -1.66 | 0.00 | -3.52 | 0.00 | -1.18 | 0.00 | -112%  | 1.86  | 41%    | -0.49 |
| Smoking (current vs. never)                                      | -0.58 | 0.66 | -1.59 | 0.20 | -0.57 | 0.64 | -173%  | 1.01  | 3%     | -0.02 |
| Smoking (smoked before vs. never)                                | 0.11  | 0.91 | -0.73 | 0.43 | -0.43 | 0.62 | 765%   | 0.84  | -125%  | 0.54  |
| <b>Mental</b>                                                    |       |      |       |      |       |      |        |       |        |       |
| No education/lowest school vs. University education              | -4.86 | 0.07 | -5.95 | 0.01 | -1.77 | 0.51 | -23%   | 1.09  | 174%   | -3.08 |
| Lower professional school vs. University education               | -1.76 | 0.32 | -8.45 | 0.00 | -0.20 | 0.91 | -381%  | 6.70  | 766%   | -1.55 |
| Middle or professional secondary school vs. University education | -0.77 | 0.53 | -2.62 | 0.01 | -0.34 | 0.80 | -241%  | 1.85  | 128%   | -0.43 |
| Secondary school vs. University education                        | 1.18  | 0.46 | -4.02 | 0.00 | 1.01  | 0.55 | 441%   | 5.20  | 17%    | 0.18  |
| Age (years)                                                      | 0.09  | 0.02 | -0.11 | 0.00 | 0.14  | 0.00 | 214%   | 0.20  | -31%   | -0.04 |
| N of comorbidities                                               | -0.31 | 0.48 | -3.87 | 0.00 | -0.24 | 0.60 | -1132% | 3.56  | 28%    | -0.07 |
| Smoking (current vs. never)                                      | -2.16 | 0.09 | -2.55 | 0.02 | -1.85 | 0.16 | -18%   | 0.38  | 17%    | -0.31 |
| Smoking (smoked before vs. never)                                | -1.58 | 0.19 | 1.42  | 0.16 | -1.46 | 0.25 | 190%   | -3.00 | 8%     | -0.12 |
| <b>Cancer</b>                                                    |       |      |       |      |       |      |        |       |        |       |
| No education/lowest school vs. University education              | -3.06 | 0.24 | -3.96 | 0.12 | -0.28 | 0.90 | -29%   | 0.90  | 989%   | -2.78 |
| Lower professional school vs. University education               | -3.30 | 0.12 | -1.08 | 0.60 | -0.29 | 0.87 | 67%    | -2.22 | 1050%  | -3.01 |
| Middle or professional secondary school vs. University education | -1.51 | 0.32 | -1.09 | 0.51 | -0.27 | 0.85 | 28%    | -0.42 | 460%   | -1.24 |

|                                                                  |       |      |       |      |       |      |        |       |        |       |
|------------------------------------------------------------------|-------|------|-------|------|-------|------|--------|-------|--------|-------|
| Secondary school vs. University education                        | 0.18  | 0.92 | 2.66  | 0.21 | -0.09 | 0.96 | -1352% | -2.47 | -305%  | 0.27  |
| Age (years)                                                      | 0.11  | 0.05 | -0.06 | 0.26 | 0.12  | 0.01 | 159%   | 0.17  | -14%   | -0.02 |
| N of comorbidities                                               | -0.59 | 0.26 | -2.40 | 0.00 | -0.26 | 0.56 | -310%  | 1.82  | 128%   | -0.33 |
| Smoking (current vs. never)                                      | -5.35 | 0.01 | -2.77 | 0.16 | -4.25 | 0.01 | 48%    | -2.57 | 26%    | -1.09 |
| Smoking (smoked before vs. never)                                | -0.10 | 0.94 | 0.88  | 0.54 | -0.43 | 0.73 | 1019%  | -0.98 | -77%   | 0.33  |
| <b>Respiratory diseases</b>                                      |       |      |       |      |       |      |        |       |        |       |
| No education/lowest school vs. University education              | -2.53 | 0.15 | -8.63 | 0.00 | 0.24  | 0.87 | -242%  | 6.11  | -1145% | -2.77 |
| Lower professional school vs. University education               | -1.96 | 0.11 | -4.61 | 0.00 | -0.92 | 0.41 | -135%  | 2.65  | 112%   | -1.04 |
| Middle or professional secondary school vs. University education | 0.91  | 0.36 | -2.65 | 0.01 | 1.15  | 0.22 | 392%   | 3.56  | -21%   | -0.25 |
| Secondary school vs. University education                        | 0.90  | 0.51 | 0.25  | 0.86 | 1.12  | 0.40 | 72%    | 0.65  | -19%   | -0.21 |
| Age (years)                                                      | 0.15  | 0.00 | -0.13 | 0.00 | 0.17  | 0.00 | 186%   | 0.28  | -10%   | -0.02 |
| N of comorbidities                                               | -1.97 | 0.00 | -3.41 | 0.00 | -1.69 | 0.00 | -73%   | 1.44  | 17%    | -0.28 |
| Smoking (current vs. never)                                      | -3.60 | 0.00 | -2.57 | 0.02 | -3.30 | 0.00 | 29%    | -1.03 | 9%     | -0.30 |
| Smoking (smoked before vs. never)                                | -1.09 | 0.24 | 0.03  | 0.98 | -1.05 | 0.23 | 103%   | -1.12 | 4%     | -0.04 |
| <b>Healthy population (no disease reported)</b>                  |       |      |       |      |       |      |        |       |        |       |
| No education/lowest school vs. University education              | -1.04 | 0.21 | -5.45 | 0.00 | -0.06 | 0.93 | -422%  | 4.40  | 1566%  | -0.98 |
| Lower professional school vs. University education               | -0.02 | 0.96 | -2.12 | 0.00 | 0.31  | 0.43 | -9290% | 2.10  | -107%  | -0.33 |
| Middle or professional secondary school vs. University education | 0.42  | 0.11 | -1.09 | 0.00 | 0.47  | 0.06 | 358%   | 1.51  | -11%   | -0.05 |
| Secondary school vs. University education                        | -0.45 | 0.23 | -0.34 | 0.26 | -0.42 | 0.25 | 23%    | -0.10 | 6%     | -0.03 |
| Age (years)                                                      | 0.08  | 0.00 | -0.08 | 0.00 | 0.10  | 0.00 | 196%   | 0.17  | -11%   | -0.01 |
| Smoking (current vs. never)                                      | -1.30 | 0.00 | -0.14 | 0.59 | -1.23 | 0.00 | 89%    | -1.16 | 5%     | -0.07 |
| Smoking (smoked before vs. never)                                | -0.07 | 0.78 | 0.06  | 0.78 | -0.14 | 0.57 | 180%   | -0.13 | -50%   | 0.07  |

| <b>Model II (PCS as outcome)</b>                                 |                    |      |                    |      |                    |      |                                   |                                              |                                       |                                              |
|------------------------------------------------------------------|--------------------|------|--------------------|------|--------------------|------|-----------------------------------|----------------------------------------------|---------------------------------------|----------------------------------------------|
|                                                                  | <b>Actual data</b> |      | <b>Actual data</b> |      | <b>Actual data</b> |      | <b>Change (%)<br/>real to min</b> | <b>Change<br/>(absolute)<br/>real to min</b> | <b>Change (%)<br/>real to<br/>max</b> | <b>Change<br/>(absolute)<br/>real to max</b> |
|                                                                  | Beta               | P>t  | Beta               | P>t  | Beta               | P>t  |                                   |                                              |                                       |                                              |
| <b>Musculoskeletal diseases</b>                                  |                    |      |                    |      |                    |      |                                   |                                              |                                       |                                              |
| Unemployed vs. Paid work                                         | -1.45              | 0.38 | -1.74              | 0.27 | -0.15              | 0.93 | -20%                              | 0.29                                         | 895%                                  | -1.31                                        |
| Receiving state subsidy vs. Paid work                            | -5.83              | 0.01 | -5.33              | 0.01 | -2.93              | 0.19 | 8%                                | -0.50                                        | 99%                                   | -2.90                                        |
| Age (years)                                                      | -0.06              | 0.10 | -0.06              | 0.09 | -0.05              | 0.19 | -2%                               | 0.00                                         | 25%                                   | -0.01                                        |
| Female vs. male                                                  | -1.88              | 0.02 | -1.67              | 0.03 | -1.91              | 0.01 | 11%                               | -0.22                                        | -1%                                   | 0.03                                         |
| N of comorbidities                                               | -1.45              | 0.00 | -1.37              | 0.00 | -1.50              | 0.00 | 6%                                | -0.08                                        | -4%                                   | 0.05                                         |
| No education/lowest school vs. University education              | -6.05              | 0.03 | -5.43              | 0.05 | -5.44              | 0.05 | 10%                               | -0.62                                        | 11%                                   | -0.61                                        |
| Lower professional school vs. University education               | -4.33              | 0.00 | -4.34              | 0.00 | -3.59              | 0.00 | 0%                                | 0.01                                         | 20%                                   | -0.73                                        |
| Middle or professional secondary school vs. University education | -2.33              | 0.01 | -2.34              | 0.01 | -2.11              | 0.02 | -1%                               | 0.02                                         | 10%                                   | -0.22                                        |
| Secondary school vs. University education                        | -3.09              | 0.02 | -2.76              | 0.03 | -3.40              | 0.01 | 11%                               | -0.33                                        | -9%                                   | 0.32                                         |
| Smoking (current vs. never)                                      | -0.87              | 0.38 | -1.23              | 0.20 | 0.06               | 0.95 | -42%                              | 0.36                                         | -1599%                                | -0.93                                        |
| Smoking (smoked before vs. never)                                | -0.16              | 0.85 | -0.54              | 0.52 | 0.25               | 0.77 | -235%                             | 0.38                                         | -164%                                 | -0.41                                        |
| <b>Cardio-vascular diseases</b>                                  |                    |      |                    |      |                    |      |                                   |                                              |                                       |                                              |
| Unemployed vs. Paid work                                         | 1.73               | 0.35 | 2.41               | 0.20 | 1.41               | 0.44 | -40%                              | -0.69                                        | 22%                                   | 0.31                                         |
| Receiving state subsidy vs. Paid work                            | -12.03             | 0.00 | -11.67             | 0.00 | -7.53              | 0.01 | 3%                                | -0.36                                        | 60%                                   | -4.49                                        |
| Age (years)                                                      | -0.01              | 0.84 | -0.02              | 0.74 | -0.01              | 0.84 | -66%                              | 0.01                                         | 4%                                    | 0.00                                         |
| Female vs. male                                                  | 0.10               | 0.90 | 0.47               | 0.57 | -0.03              | 0.97 | -353%                             | -0.37                                        | -424%                                 | 0.14                                         |
| N of comorbidities                                               | -2.92              | 0.00 | -2.90              | 0.00 | -2.96              | 0.00 | 0%                                | -0.01                                        | -1%                                   | 0.04                                         |
| No education/lowest school vs. University education              | -6.05              | 0.08 | -6.95              | 0.03 | -6.46              | 0.04 | -15%                              | 0.90                                         | -6%                                   | 0.41                                         |
| Lower professional school vs. University education               | -1.13              | 0.39 | -2.03              | 0.11 | -0.53              | 0.67 | -80%                              | 0.91                                         | 113%                                  | -0.60                                        |



|                                                                  |        |      |        |      |       |      |      |       |      |       |
|------------------------------------------------------------------|--------|------|--------|------|-------|------|------|-------|------|-------|
| Middle or professional secondary school vs. University education | -1.25  | 0.17 | -1.33  | 0.15 | -1.13 | 0.21 | -7%  | 0.08  | 10%  | -0.12 |
| Secondary school vs. University education                        | -1.35  | 0.29 | -1.07  | 0.41 | -1.51 | 0.24 | 21%  | -0.28 | -10% | 0.15  |
| Smoking (current vs. never)                                      | 1.47   | 0.19 | 1.58   | 0.16 | 1.86  | 0.09 | -7%  | -0.11 | -21% | -0.39 |
| Smoking (smoked before vs. never)                                | 1.72   | 0.05 | 1.52   | 0.08 | 1.87  | 0.03 | 12%  | 0.20  | -8%  | -0.15 |
| <b>Diabetes</b>                                                  |        |      |        |      |       |      |      |       |      |       |
| Unemployed vs. Paid work                                         | 3.19   | 0.24 | 2.70   | 0.29 | 4.08  | 0.15 | 15%  | 0.49  | -22% | -0.89 |
| Receiving state subsidy vs. Paid work                            | -12.58 | 0.02 | -9.64  | 0.01 | -8.62 | 0.03 | 23%  | -2.94 | 46%  | -3.96 |
| Age (years)                                                      | -0.11  | 0.23 | -0.16  | 0.08 | -0.04 | 0.68 | -43% | 0.05  | 173% | -0.07 |
| Female vs. male                                                  | -0.66  | 0.68 | -0.55  | 0.72 | -0.42 | 0.80 | 16%  | -0.11 | 56%  | -0.24 |
| N of comorbidities                                               | -2.38  | 0.00 | -2.29  | 0.00 | -2.69 | 0.00 | 4%   | -0.08 | -12% | 0.31  |
| No education/lowest school vs. University education              | -9.98  | 0.21 | -13.88 | 0.00 | -4.52 | 0.37 | -39% | 3.90  | 121% | -5.46 |
| Lower professional school vs. University education               | -5.88  | 0.01 | -7.17  | 0.00 | -3.78 | 0.11 | -22% | 1.29  | 55%  | -2.09 |
| Middle or professional secondary school vs. University education | -2.41  | 0.18 | -2.30  | 0.20 | -2.32 | 0.23 | 4%   | -0.10 | 4%   | -0.08 |
| Secondary school vs. University education                        | -2.34  | 0.34 | -3.24  | 0.18 | -1.74 | 0.51 | -39% | 0.90  | 34%  | -0.59 |
| Smoking (current vs. never)                                      | -1.91  | 0.36 | -2.14  | 0.27 | -0.32 | 0.88 | -12% | 0.24  | 498% | -1.59 |
| Smoking (smoked before vs. never)                                | -0.51  | 0.78 | -0.03  | 0.99 | -0.99 | 0.61 | 95%  | -0.49 | -48% | 0.48  |
| <b>Mental</b>                                                    |        |      |        |      |       |      |      |       |      |       |
| Unemployed vs. Paid work                                         | 0.80   | 0.67 | -0.38  | 0.84 | 1.63  | 0.35 | 148% | 1.19  | -51% | -0.82 |
| Receiving state subsidy vs. Paid work                            | -7.26  | 0.00 | -6.91  | 0.01 | -7.58 | 0.00 | 5%   | -0.35 | -4%  | 0.31  |
| Age (years)                                                      | -0.10  | 0.06 | -0.07  | 0.18 | -0.09 | 0.07 | 25%  | -0.02 | 5%   | 0.00  |
| Female vs. male                                                  | -1.56  | 0.20 | -1.08  | 0.38 | -2.00 | 0.09 | 31%  | -0.47 | -22% | 0.44  |
| N of comorbidities                                               | -3.24  | 0.00 | -3.27  | 0.00 | -3.17 | 0.00 | -1%  | 0.03  | 2%   | -0.06 |
| No education/lowest school vs. University education              | 8.93   | 0.14 | 9.26   | 0.15 | 8.75  | 0.14 | -4%  | -0.32 | 2%   | 0.18  |
| Lower professional school vs. University education               | -7.89  | 0.00 | -7.96  | 0.00 | -7.51 | 0.00 | -1%  | 0.06  | 5%   | -0.38 |

|                                                                  |       |      |       |      |       |      |        |       |       |       |
|------------------------------------------------------------------|-------|------|-------|------|-------|------|--------|-------|-------|-------|
| Middle or professional secondary school vs. University education | -1.74 | 0.16 | -1.74 | 0.18 | -1.37 | 0.26 | 0%     | -0.01 | 28%   | -0.38 |
| Secondary school vs. University education                        | -4.75 | 0.01 | -4.26 | 0.02 | -4.73 | 0.01 | 10%    | -0.49 | 0%    | -0.01 |
| Smoking (current vs. never)                                      | -0.95 | 0.48 | -0.60 | 0.67 | -1.00 | 0.45 | 37%    | -0.35 | -5%   | 0.05  |
| Smoking (smoked before vs. never)                                | 3.19  | 0.01 | 2.69  | 0.04 | 3.30  | 0.01 | 16%    | 0.50  | -3%   | -0.10 |
| <b>Cancer</b>                                                    |       |      |       |      |       |      |        |       |       |       |
| Unemployed vs. Paid work                                         | 6.74  | 0.27 | 4.53  | 0.41 | 8.36  | 0.13 | 33%    | 2.21  | -19%  | -1.62 |
| Receiving state subsidy vs. Paid work                            | n/a   |      | n/a   |      | n/a   |      | n/a    | n/a   | n/a   | n/a   |
| Age (years)                                                      | 0.00  | 1.00 | -0.04 | 0.81 | 0.04  | 0.83 | -7753% | 0.04  | -101% | -0.04 |
| Female vs. male                                                  | 0.77  | 0.80 | 1.02  | 0.73 | 0.52  | 0.86 | -33%   | -0.25 | 47%   | 0.25  |
| N of comorbidities                                               | -1.90 | 0.23 | -1.84 | 0.22 | -2.02 | 0.18 | 3%     | -0.06 | -6%   | 0.12  |
| No education/lowest school vs. University education              | 3.98  | 0.63 | 4.14  | 0.61 | 3.86  | 0.64 | -4%    | -0.15 | 3%    | 0.12  |
| Lower professional school vs. University education               | -1.65 | 0.72 | -3.70 | 0.39 | 0.25  | 0.95 | -124%  | 2.05  | -769% | -1.90 |
| Middle or professional secondary school vs. University education | -0.23 | 0.95 | -0.27 | 0.94 | -0.10 | 0.98 | -17%   | 0.04  | 122%  | -0.13 |
| Secondary school vs. University education                        | -0.14 | 0.97 | -0.39 | 0.92 | 0.12  | 0.97 | -188%  | 0.26  | -217% | -0.25 |
| Smoking (current vs. never)                                      | -1.11 | 0.79 | -0.04 | 0.99 | -2.09 | 0.60 | 96%    | -1.06 | -47%  | 0.98  |
| Smoking (smoked before vs. never)                                | 0.78  | 0.80 | 1.26  | 0.66 | 0.19  | 0.95 | -62%   | -0.49 | 302%  | 0.58  |
| <b>Respiratory diseases</b>                                      |       |      |       |      |       |      |        |       |       |       |
| Unemployed vs. Paid work                                         | -3.12 | 0.22 | -2.27 | 0.39 | -3.57 | 0.16 | 27%    | -0.85 | -13%  | 0.45  |
| Receiving state subsidy vs. Paid work                            | -8.57 | 0.02 | -8.94 | 0.01 | -5.92 | 0.08 | -4%    | 0.37  | 45%   | -2.65 |
| Age (years)                                                      | -0.07 | 0.19 | -0.09 | 0.11 | -0.07 | 0.15 | -24%   | 0.02  | -6%   | 0.00  |
| Female vs. male                                                  | -0.14 | 0.90 | 0.24  | 0.83 | -0.26 | 0.82 | 276%   | -0.38 | -47%  | 0.12  |
| N of comorbidities                                               | -3.38 | 0.00 | -3.12 | 0.00 | -3.62 | 0.00 | 8%     | -0.26 | -7%   | 0.24  |
| No education/lowest school vs. University education              | -6.70 | 0.19 | -6.11 | 0.23 | -8.79 | 0.08 | 9%     | -0.59 | -24%  | 2.09  |
| Lower professional school vs. University education               | -2.44 | 0.15 | -2.25 | 0.19 | -2.19 | 0.19 | 8%     | -0.18 | 12%   | -0.25 |

|                                                                  |       |      |       |      |       |      |        |       |       |       |
|------------------------------------------------------------------|-------|------|-------|------|-------|------|--------|-------|-------|-------|
| Middle or professional secondary school vs. University education | -0.34 | 0.79 | -0.74 | 0.56 | -0.10 | 0.94 | -120%  | 0.41  | 235%  | -0.24 |
| Secondary school vs. University education                        | -1.20 | 0.51 | -0.65 | 0.73 | -1.43 | 0.43 | 46%    | -0.55 | -16%  | 0.23  |
| Smoking (current vs. never)                                      | -0.42 | 0.79 | -0.47 | 0.77 | -0.10 | 0.95 | -11%   | 0.05  | 328%  | -0.32 |
| Smoking (smoked before vs. never)                                | 1.52  | 0.23 | 0.84  | 0.50 | 1.81  | 0.14 | 44%    | 0.67  | -16%  | -0.30 |
| <b>Healthy population (no disease reported)</b>                  |       |      |       |      |       |      |        |       |       |       |
| Unemployed vs. Paid work                                         | -0.76 | 0.14 | -0.80 | 0.19 | -0.71 | 0.16 | -6%    | 0.04  | 7%    | -0.05 |
| Receiving state subsidy vs. Paid work                            | -1.02 | 0.47 | -3.60 | 0.02 | -0.26 | 0.84 | -254%  | 2.58  | 297%  | -0.76 |
| Age (years)                                                      | -0.02 | 0.03 | -0.04 | 0.00 | -0.01 | 0.08 | -104%  | 0.02  | 31%   | 0.00  |
| Female vs. male                                                  | -0.53 | 0.00 | -0.40 | 0.05 | -0.52 | 0.00 | 23%    | -0.12 | 0%    | 0.00  |
| No education/lowest school vs. University education              | -0.23 | 0.79 | -2.51 | 0.01 | 0.25  | 0.75 | -1014% | 2.28  | -191% | -0.47 |
| Lower professional school vs. University education               | -1.05 | 0.00 | -1.36 | 0.00 | -0.95 | 0.01 | -30%   | 0.32  | 10%   | -0.10 |
| Middle or professional secondary school vs. University education | -0.85 | 0.00 | -1.01 | 0.00 | -0.79 | 0.00 | -19%   | 0.16  | 7%    | -0.06 |
| Secondary school vs. University education                        | -0.34 | 0.25 | -0.27 | 0.43 | -0.35 | 0.23 | 20%    | -0.07 | -1%   | 0.00  |
| Smoking (current vs. never)                                      | -0.47 | 0.05 | -0.53 | 0.06 | -0.44 | 0.06 | -12%   | 0.06  | 6%    | -0.03 |
| Smoking (smoked before vs. never)                                | -0.41 | 0.04 | -0.24 | 0.30 | -0.43 | 0.03 | 40%    | -0.16 | -4%   | 0.02  |

n/a-sub group size is not enough to compute an estimation

| <b>Model II (MCS as outcome)</b>      |                    |      |                    |      |                    |      |                                   |                                              |                                       |                                              |
|---------------------------------------|--------------------|------|--------------------|------|--------------------|------|-----------------------------------|----------------------------------------------|---------------------------------------|----------------------------------------------|
|                                       | <b>Actual data</b> |      | <b>Actual data</b> |      | <b>Actual data</b> |      | <b>Change (%)<br/>real to min</b> | <b>Change<br/>(absolute)<br/>real to min</b> | <b>Change (%)<br/>real to<br/>max</b> | <b>Change<br/>(absolute)<br/>real to max</b> |
|                                       | Beta               | P>t  | Beta               | P>t  | Beta               | P>t  |                                   |                                              |                                       |                                              |
| <b>Musculoskeletal diseases</b>       |                    |      |                    |      |                    |      |                                   |                                              |                                       |                                              |
| Unemployed vs. Paid work              | 0.96               | 0.53 | -1.89              | 0.22 | 1.69               | 0.25 | 296%                              | 2.86                                         | -43%                                  | -0.72                                        |
| Receiving state subsidy vs. Paid work | -3.10              | 0.15 | -6.83              | 0.00 | -1.16              | 0.55 | -120%                             | 3.73                                         | 166%                                  | -1.94                                        |
| N of comorbidities                    | -2.60              | 0.00 | -1.61              | 0.00 | -2.59              | 0.00 | 38%                               | -0.99                                        | 0%                                    | -0.01                                        |
| Age (years)                           | 0.09               | 0.01 | -0.06              | 0.09 | 0.09               | 0.01 | 170%                              | 0.15                                         | -2%                                   | 0.00                                         |
| Smoking (current vs. never)           | -2.14              | 0.02 | -1.80              | 0.06 | -1.35              | 0.13 | 16%                               | -0.34                                        | 59%                                   | -0.80                                        |
| Smoking (smoked before vs. never)     | 0.21               | 0.79 | -0.31              | 0.71 | 0.59               | 0.44 | 245%                              | 0.52                                         | -64%                                  | -0.38                                        |
| <b>Cardio-vascular diseases</b>       |                    |      |                    |      |                    |      |                                   |                                              |                                       |                                              |
| Unemployed vs. Paid work              | -2.58              | 0.17 | 2.05               | 0.26 | -2.91              | 0.12 | 180%                              | -4.63                                        | -12%                                  | 0.34                                         |
| Receiving state subsidy vs. Paid work | -3.11              | 0.30 | -13.74             | 0.00 | -0.39              | 0.88 | -342%                             | 10.63                                        | 700%                                  | -2.72                                        |
| N of comorbidities                    | -2.67              | 0.00 | -3.47              | 0.00 | -2.71              | 0.00 | -30%                              | 0.81                                         | -2%                                   | 0.04                                         |
| Age (years)                           | 0.08               | 0.09 | 0.00               | 0.95 | 0.07               | 0.09 | 104%                              | 0.08                                         | 4%                                    | 0.00                                         |
| Smoking (current vs. never)           | -0.32              | 0.78 | 1.51               | 0.17 | -0.02              | 0.99 | 571%                              | -1.83                                        | 1475%                                 | -0.30                                        |
| Smoking (smoked before vs. never)     | 0.80               | 0.36 | 1.61               | 0.06 | 0.98               | 0.25 | -102%                             | -0.81                                        | -18%                                  | -0.18                                        |
| <b>Diabetes</b>                       |                    |      |                    |      |                    |      |                                   |                                              |                                       |                                              |
| Unemployed vs. Paid work              | -5.02              | 0.08 | 3.69               | 0.15 | -4.00              | 0.15 | 174%                              | -8.71                                        | 25%                                   | -1.02                                        |
| Receiving state subsidy vs. Paid work | -8.85              | 0.03 | -15.08             | 0.00 | -4.50              | 0.20 | -70%                              | 6.23                                         | 97%                                   | -4.35                                        |
| N of comorbidities                    | -1.78              | 0.02 | -1.98              | 0.01 | -2.00              | 0.01 | -11%                              | 0.20                                         | -11%                                  | 0.21                                         |
| Age (years)                           | 0.03               | 0.76 | -0.18              | 0.05 | 0.08               | 0.43 | 699%                              | 0.21                                         | -61%                                  | -0.05                                        |
| Smoking (current vs. never)           | -0.87              | 0.69 | -2.33              | 0.24 | 0.17               | 0.94 | -168%                             | 1.46                                         | -619%                                 | -1.04                                        |
| Smoking (smoked before vs. never)     | -0.02              | 0.99 | -0.87              | 0.62 | -0.08              | 0.97 | -4122%                            | 0.85                                         | -73%                                  | 0.05                                         |
| <b>Mental diseases</b>                |                    |      |                    |      |                    |      |                                   |                                              |                                       |                                              |
| Unemployed vs. Paid work              | 0.86               | 0.73 | 0.94               | 0.61 | 2.88               | 0.23 | -10%                              | -0.08                                        | -70%                                  | -2.02                                        |

|                                                 |        |      |        |      |       |      |       |        |       |       |
|-------------------------------------------------|--------|------|--------|------|-------|------|-------|--------|-------|-------|
| Receiving state subsidy vs. Paid work           | -3.59  | 0.27 | -8.07  | 0.00 | -4.12 | 0.22 | -124% | 4.47   | -13%  | 0.53  |
| N of comorbidities                              | -0.67  | 0.37 | -4.41  | 0.00 | -0.68 | 0.38 | -557% | 3.74   | -1%   | 0.01  |
| Age (years)                                     | 0.12   | 0.09 | -0.04  | 0.41 | 0.11  | 0.12 | 137%  | 0.16   | 8%    | 0.01  |
| Smoking (current vs. never)                     | -2.32  | 0.18 | -0.90  | 0.51 | -2.67 | 0.14 | 61%   | -1.42  | -13%  | 0.35  |
| Smoking (smoked before vs. never)               | -0.67  | 0.68 | 2.24   | 0.08 | -0.03 | 0.99 | 436%  | -2.91  | 1995% | -0.64 |
| <b>Cancer</b>                                   |        |      |        |      |       |      |       |        |       |       |
| Unemployed vs. Paid work                        | -8.41  | 0.05 | 5.30   | 0.27 | -6.12 | 0.12 | 163%  | -13.72 | 37%   | -2.29 |
| Receiving state subsidy vs. Paid work           | n/a    |      | n/a    |      | n/a   |      | n/a   | n/a    | n/a   | n/a   |
| N of comorbidities                              | 1.01   | 0.37 | -2.14  | 0.11 | 1.14  | 0.30 | 311%  | 3.15   | -11%  | -0.12 |
| Age (years)                                     | 0.20   | 0.13 | -0.04  | 0.77 | 0.24  | 0.07 | 123%  | 0.24   | -17%  | -0.04 |
| Smoking (current vs. never)                     | -3.00  | 0.34 | -0.24  | 0.95 | -3.85 | 0.22 | 92%   | -2.76  | -22%  | 0.85  |
| Smoking (smoked before vs. never)               | -0.84  | 0.72 | 1.52   | 0.58 | -1.11 | 0.62 | 281%  | -2.36  | -24%  | 0.27  |
| <b>Respiratory diseases</b>                     |        |      |        |      |       |      |       |        |       |       |
| Unemployed vs. Paid work                        | -0.72  | 0.78 | -2.95  | 0.25 | -1.13 | 0.67 | -307% | 2.22   | -36%  | 0.40  |
| Receiving state subsidy vs. Paid work           | -7.23  | 0.03 | -10.74 | 0.00 | -5.26 | 0.09 | -49%  | 3.51   | 37%   | -1.97 |
| N of comorbidities                              | -2.01  | 0.00 | -3.20  | 0.00 | -2.23 | 0.00 | -59%  | 1.19   | -10%  | 0.22  |
| Age (years)                                     | 0.06   | 0.29 | -0.09  | 0.06 | 0.05  | 0.33 | 267%  | 0.15   | 11%   | 0.01  |
| Smoking (current vs. never)                     | -2.76  | 0.08 | -1.07  | 0.47 | -2.31 | 0.13 | 61%   | -1.69  | 19%   | -0.44 |
| Smoking (smoked before vs. never)               | 0.25   | 0.85 | 0.79   | 0.52 | 0.70  | 0.58 | -215% | -0.54  | -64%  | -0.45 |
| <b>Healthy population (no disease reported)</b> |        |      |        |      |       |      |       |        |       |       |
| Unemployed vs. Paid work                        | -2.46  | 0.00 | -0.97  | 0.09 | -2.35 | 0.00 | 61%   | -1.50  | 5%    | -0.11 |
| Receiving state subsidy vs. Paid work           | -10.16 | 0.00 | -3.90  | 0.01 | -6.64 | 0.00 | 62%   | -6.26  | 53%   | -3.52 |
| Age (years)                                     | 0.08   | 0.00 | -0.04  | 0.00 | 0.09  | 0.00 | 147%  | 0.11   | -9%   | -0.01 |
| Smoking (current vs. never)                     | -1.34  | 0.00 | -0.72  | 0.01 | -1.23 | 0.00 | 46%   | -0.61  | 9%    | -0.11 |
| Smoking (smoked before vs. never)               | -0.26  | 0.39 | -0.36  | 0.10 | -0.31 | 0.31 | -38%  | 0.10   | -14%  | 0.04  |

n/a-sub group size is not enough to compute an estimation
